# Supplementary material for: Caregiver Knowledge, Attitude, and Behavior toward Care of Children with Cerebral Palsy: A Saudi Arabian Perspective
Source: MDPI journal article supplement (doi:10.3390/healthcare12100982), 2024-05-10
Supplement: s1 [file s1]

## Supplementary material

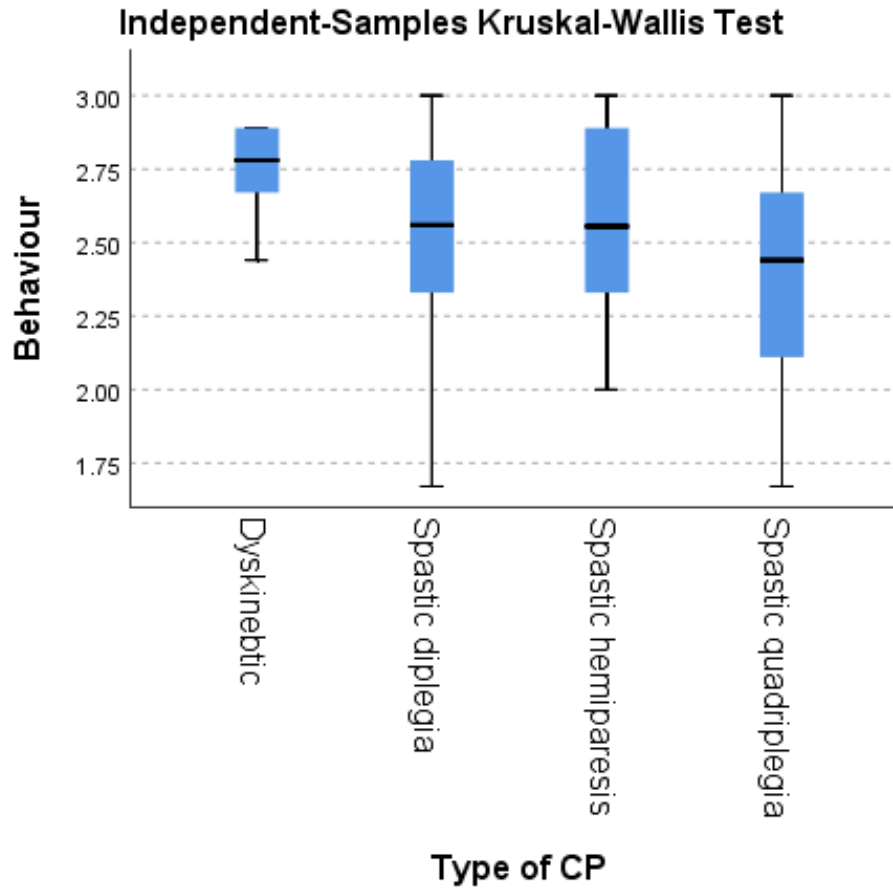

**Figure S1.** Type of CP.

**Table S1.** Pairwise Comparisons of Type of CP.

| Sample 1-Sample 2                        | Test Statistic | Std. Error | Std. Test Statistic | Sig.  | Adj. Sig. <sup>a</sup> |
|------------------------------------------|----------------|------------|---------------------|-------|------------------------|
| Spastic quadriplegia-Spastic diplegia    | 19.602         | 8.863      | 2.212               | 0.027 | 0.162                  |
| Spastic quadriplegia-Spastic hemiparesis | 27.329         | 17.747     | 1.540               | 0.124 | 0.741                  |
| Spastic quadriplegia-Dyskinebtic         | 55.765         | 28.499     | 1.957               | 0.050 | 0.302                  |
| Spastic diplegia-Spastic hemiparesis     | -7.727         | 17.780     | -0.435              | 0.664 | 1.000                  |
| Spastic diplegia-Dyskinebtic             | 36.163         | 28.520     | 1.268               | 0.205 | 1.000                  |
| Spastic hemiparesis-Dyskinebtic          | 28.436         | 32.401     | 0.878               | 0.380 | 1.000                  |

Each row tests the null hypothesis that the Sample 1 and Sample 2 distributions are the same.

A symptotic significances (2-sided tests) are displayed. The significance level is .05.

a. Significance values have been adjusted by the Bonferroni correction for multiple tests.

**Table S2.** Behavior related to age of the CP child and type of CP

| Model |                 | Unstandardized |            | Coefficients <sup>a</sup>      |        | 95.0% Confidence Interval for |                           |
|-------|-----------------|----------------|------------|--------------------------------|--------|-------------------------------|---------------------------|
|       |                 | B              | Std. Error | Standardized Coefficients Beta | t      | Sig.                          | B Lower Bound Upper Bound |
| 1     | (Constant)      | 2.814          | 0.102      |                                | 27.501 | 0.000                         | 2.612 3.016               |
|       | Age of CP child | -0.102         | 0.048      | -0.141                         | -2.115 | 0.036                         | -0.197 -0.007             |
|       | Type of CP      | -0.059         | 0.024      | -0.163                         | -2.443 | 0.015                         | -0.106 -0.011             |

a. Dependent Variable: Behaviour
